# Supplementary material
Source: Springer Nature journal article supplement (https://www.springermedizin.de/resource/supplementary/12906_2006_99_MOESM1_ESM.pdf/9524014)
Supplement: MOESM1 [file 9524014]

PubMed search May 16, 2006, for keyword “acupuncture” with publication in “2005” (n=698)

Excluded articles not marked “clinical trials” (n=597).

Acupuncture “clinical trials” in “2005” (n=101)

Excluded non-English (6 Chinese, 1 German, 1 Korean) (n=8)

Acupuncture “clinical trials” in “2005” in English (n=93)

Excluded articles with early e-pub date in 2005 but actually published in 2006 (n=5)

Obtain and review articles to establish inclusion (n=88)

Excluded 6 articles which were not acupuncture clinical trial reports, 2 letters and one brief report (n=9).

Articles for systematic review (n=79)
